# Supplementary material for: Identifying Early Stages of Freshwater Fish with DNA Barcodes in Several Sinkholes and Lagoons from the East of Yucatan Peninsula, Mexico
Source: MDPI journal article supplement (doi:10.3390/d13110513), 2021-10-22

# BOLD TaxonID Tree

Title : Tree Result - Search: Process IDs (350 records returned) (350 records selected)

Date : 19-May-2021

Data Type : Nucleotide

Distance Model : Kimura 2 Parameter

Marker : COI-5P

Colourization : [blue]=Stop Codons [red]=Contamination or misidentification

  

Label : Sample ID

Label : Taxon

Label : Exact Site

Label : Barcode Cluster (BIN)

  
  

Sequence Count : 347

Species count : 20

Genus count : 19

Family count : 12

Unidentified : 17

  
  

BIN Count : 20

5 %

Gobiosoma yucatanum|BACQ-101|Huay Pix, near the bridge. RAS  
 Gobiosoma yucatanum|BACQ-97|Huay Pix, near the bridge. RAS  
 Gobiosoma yucatanum|BACQ-99|Huay Pix, near the bridge. RAS  
 Gobiosoma yucatanum|BACQ-100|Huay Pix, near the bridge. RAS  
 Gobiosoma yucatanum|BACQ-98|Huay Pix, near the bridge. RAS  
 Gobiosoma yucatanum|BACQ-23|Balneario Cocalitos TL1 Cenote|BOLD:ACV0831  
 Gobiosoma yucatanum|MXV718|Balneario Cocalitos|BOLD:ACV0831  
 Gobiosoma yucatanum|BACQ-120|Cayuco Maya|BOLD:ACV0831  
 Gobiosoma yucatanum|BACQ-57|Balneario Cocalitos TL1 Cenote|BOLD:ACV0831  
 Gobiosoma yucatanum|BACQ-68|Balneario Cocalitos TL Profundo Cenote|BOLD:ACV0831  
 Gobiosoma yucatanum|MXV738|Balneario Cocalitos|BOLD:ACV0831  
 Gobiosoma yucatanum|BACQ-19|Balneario Cocalitos TL1 Cenote|BOLD:ACV0831  
 Gobiosoma yucatanum|BACQ-63|Balneario Cocalitos TL Profundo Cenote|BOLD:ACV0831  
 Gobiosoma yucatanum|BACQ-49|Balneario Cocalitos TL1 Cenote|BOLD:ACV0831  
 Gobiosoma yucatanum|BACQ-121|Cayuco Maya|BOLD:ACV0831  
 Gobiosoma yucatanum|BACQ-60|Balneario Cocalitos TL Profundo Cenote|BOLD:ACV0831  
 Gobiosoma yucatanum|BACQ-122|Cayuco Maya|BOLD:ACV0831  
 Gobiosoma yucatanum|MXV736|Balneario Cocalitos|BOLD:ACV0831  
 Gobiosoma yucatanum|MXV726|Balneario Cocalitos|BOLD:ACV0831  
 Gobiosoma yucatanum|MXV724|Balneario Cocalitos|BOLD:ACV0831  
 Gobiosoma yucatanum|BACQ-17|Balneario Cocalitos TL1 Cenote|BOLD:ACV0831  
 Gobiosoma yucatanum|BACQ-34|Balneario Cocalitos TL1 Cenote|BOLD:ACV0831  
 Gobiosoma yucatanum|BACQ-54|Balneario Cocalitos TL1 Cenote|BOLD:ACV0831  
 Gobiosoma yucatanum|BACQ-58|Balneario Cocalitos TL Profundo Cenote|BOLD:ACV0831  
 Gobiosoma yucatanum|BACQ-26|Balneario Cocalitos TL1 Cenote  
 Gobiosoma yucatanum|BACQ-50|Balneario Cocalitos TL1 Cenote|BOLD:ACV0831  
 Gobiosoma yucatanum|MXV740|Balneario Cocalitos|BOLD:ACV0831  
 Gobiosoma yucatanum|CH0000721\_D05|Cenote Cocalitos|BOLD:ACV0831  
 Gobiosoma yucatanum|CH0000721\_F07|Cenote Cocalitos, Bacalar|BOLD:ACV0831  
 Gobiosoma yucatanum|CH0000721\_F04|Cenote Cocalitos, Bacalar|BOLD:ACV0831  
 Gobiosoma yucatanum|BACQ-48|Balneario Cocalitos TL1 Cenote|BOLD:ACV0831  
 Gobiosoma yucatanum|MXV734|Balneario Cocalitos|BOLD:ACV0831  
 Gobiosoma yucatanum|BACQ-25|Balneario Cocalitos TL1 Cenote|BOLD:ACV0831  
 Gobiosoma yucatanum|MXV737|Balneario Cocalitos|BOLD:ACV0831  
 Gobiosoma yucatanum|BACQ-01|Balneario Cocalitos TL2 Estromatolitos|BOLD:ACV0831  
 Gobiosoma yucatanum|MXV739|Balneario Cocalitos|BOLD:ACV0831  
 Gobiosoma yucatanum|MXV743|Balneario Cocalitos|BOLD:ACV0831  
 Gobiosoma yucatanum|MXV722|Balneario Cocalitos|BOLD:ACV0831  
 Gobiosoma yucatanum|BACQ-32|Balneario Cocalitos TL1 Cenote|BOLD:ACV0831  
 Gobiosoma yucatanum|BACQ-33|Balneario Cocalitos TL1 Cenote|BOLD:ACV0831  
 Gobiosoma yucatanum|BACQ-24|Balneario Cocalitos TL1 Cenote|BOLD:ACV0831  
 Gobiosoma yucatanum|BACQ-62|Balneario Cocalitos TL Profundo Cenote|BOLD:ACV0831  
 Gobiosoma yucatanum|BACQ-61|Balneario Cocalitos TL Profundo Cenote|BOLD:ACV0831  
 Gobiosoma yucatanum|MXV719|Balneario Cocalitos|BOLD:ACV0831  
 Gobiosoma yucatanum|CH0000721\_F08|Cenote Cocalitos, Bacalar|BOLD:ACV0831  
 Gobiosoma yucatanum|CH0000721\_F06|Cenote Cocalitos, Bacalar|BOLD:ACV0831  
 Gobiosoma yucatanum|CH0000721\_F05|Cenote Cocalitos, Bacalar|BOLD:ACV0831  
 Gobiosoma yucatanum|CH0000721\_F03|Cenote Cocalitos, Bacalar|BOLD:ACV0831  
 Gobiosoma yucatanum|CH0000721\_F02|Cenote Cocalitos, Bacalar|BOLD:ACV0831  
 Gobiosoma yucatanum|CH0000721\_F09|Cenote Cocalitos, Bacalar|BOLD:ACV0831  
 Gambusia yucatana|CH790-E06|Cenote Chanchah Veracruz  
 Gambusia yucatana|CH790-A12|Chankah veracruz  
 Gambusia yucatana|CH790-F04|Cenote Chanchah Veracruz  
 Gambusia yucatana|CH765-G06|Cenote Chanchah Veracruz|BOLD:AAA4520  
 Gambusia yucatana|CH765-G05|Cenote Chanchah Veracruz|BOLD:AAA4520  
 Cyprinodon artifrons|CH764-H10|Laguna Muyil 1|BOLD:AAA8182  
 Cyprinodon artifrons|CH765-C02|Laguna Chunyaxche 1|BOLD:AAA8182  
 Cyprinodon artifrons|CH765-C03|Laguna Chunyaxche 1|BOLD:AAA8182  
 Cyprinodon artifrons|CH765-C05|Laguna Chunyaxche 1|BOLD:AAA8182  
 Cyprinodon artifrons|CH765-C06|Laguna Chunyaxche 1|BOLD:AAA8182  
 Cyprinodon artifrons|CH765-C11|Laguna Chunyaxche 1|BOLD:AAA8182  
 Cyprinodon artifrons|CH765-E09|Laguna Muyil 1|BOLD:AAA8182  
 Cyprinodon artifrons|CH765-F01|Laguna Muyil 1|BOLD:AAA8182  
 Cyprinodon artifrons|CH765-F04|Laguna Muyil 1|BOLD:AAA8182  
 Cyprinodon artifrons|CH765-F08|Laguna Chunyaxche 2|BOLD:AAA8182  
 Cyprinodon artifrons|CH765-G09|Laguna Chunyaxche 1|BOLD:AAA8182  
 Cyprinodon artifrons|CH790-A02|Laguna Chunyaxche 1 pasto  
 Cyprinodon artifrons|CH790-A03|Laguna Chunyaxche 1 pasto  
 Cyprinodon artifrons|CH790-A05|Laguna Chunyaxche 1 pasto  
 Cyprinodon artifrons|CH790-A07|Laguna Chunyaxche 1 pasto  
 Cyprinodon artifrons|CH790-A11|Laguna Chunyaxche 1 pasto  
 Cyprinodon artifrons|CH790-B01|Laguna chunyaxche  
 Cyprinodon artifrons|CH790-B02|Laguna Chunyaxche 1 pasto  
 Cyprinodon artifrons|CH790-D02|Laguna Chunyaxche 1 pasto  
 Cyprinodon artifrons|CH790-D04|Laguna Chunyaxche 1 pasto  
 Cyprinodon artifrons|CH790-D05|Laguna Chunyaxche 1 pasto  
 Cyprinodon artifrons|CH790-D08|Muyil 1  
 Cyprinodon artifrons|CH790-D11|Muyil 1  
 Cyprinodon artifrons|CH790-E05|Muyil 1  
 Cyprinodon artifrons|CH790-E09|Muyil 2  
 Cyprinodon artifrons|CH790-F11|Laguna Chunyaxche 2 manglar  
 Cyprinodon artifrons|CH790-G09|Laguna Chunyaxche 1 pasto  
 Cyprinodon artifrons|CH790-D10|Muyil 1  
 Cyprinodon artifrons|CH765-D01|Laguna Chunyaxche 1|BOLD:AAA8182  
 Cyprinodon artifrons|CH790-E02|Muyil 1  
 Cyprinodon artifrons|CH790-E07|Muyil 1  
 Cyprinodon artifrons|CH790-E10|Muyil 2

Cyprinodon artifrons|CH790-E07|Muyil 1  
Cyprinodon artifrons|CH790-E10|Muyil 2  
Cyprinodon artifrons|CH790-F12|Laguna Chunyaxche 2 manglar  
Cyprinodon artifrons|CH790-G03|Laguna Chunyaxche 2 manglar  
Cyprinodon artifrons|CH790-D06|Laguna Chunyaxche 1 pasto  
Cyprinodon artifrons|CH790-E03|Muyil 1  
Cyprinodon artifrons|CH790-E08|Muyil 2  
Cyprinodon artifrons|CH790-F07|Muyil 2  
Cyprinodon artifrons|CH790-G04|Laguna Chunyaxche 2 manglar  
Cyprinodon artifrons|CH790-G12|Laguna Chunyaxche 1 pasto  
Cyprinodon artifrons|CH790-E04|Muyil 1  
Cyprinodon artifrons|CH790-D12|Muyil 1  
Cyprinodon artifrons|BACQ-67|Balneario Cocalitos TL Profundo Cenote|BOLD:AAA8182  
Cyprinodon artifrons|BACQ-66|Balneario Cocalitos TL Profundo Cenote|BOLD:AAA8182  
Cyprinodon artifrons|BACQ-07|Balneario Cocalitos TL3 Pastos|BOLD:AAA8182  
Cyprinodon artifrons|MXV729|Balneario Cocalitos|BOLD:AAA8182  
Cyprinodon artifrons|MXV728|Balneario Cocalitos|BOLD:AAA8182  
Cyprinodon artifrons|BACQ-59|Balneario Cocalitos TL Profundo Cenote|BOLD:AAA8182  
Cyprinodon artifrons|BACQ-06|Balneario Cocalitos TL2 Estromatolitos|BOLD:AAA8182  
Cyprinodon artifrons|CH0000721\_D03|Cenote Cocalitos, Bacalar|BOLD:AAA8182  
Cyprinodon artifrons|CH0000721\_D12|Cenote Cocalitos, Bacalar  
Cyprinodon artifrons|CH0000721\_D04|Cenote Cocalitos, Bacalar|BOLD:AAA8182  
Cyprinodon artifrons|CH0000721\_D10|Cenote Cocalitos, Bacalar  
Cyprinodon artifrons|CH0000721\_D07|Cenote Cocalitos, Bacalar|BOLD:AAA8182  
Cyprinodon artifrons|CH790-D03|Laguna Chunyaxche 1 pasto  
Cyprinodon artifrons|CH0000721\_D11|Cenote Cocalitos, Bacalar  
Floridichthys polyommus|CH790-F02|Muyil 2  
Floridichthys polyommus|CH790-G02|Laguna Chunyaxche 2 manglar  
Floridichthys polyommus|CH765-C10|Laguna Chunyaxche 1|BOLD:AAA6554  
Floridichthys polyommus|CH765-C12|Laguna Chunyaxche 1|BOLD:AAA6554  
Floridichthys polyommus|CH765-F09|Laguna Chunyaxche 2|BOLD:AAA6554  
Floridichthys polyommus|CH790-A06|Laguna Chunyaxche 1 pasto  
Floridichthys polyommus|CH790-A08|Laguna Chunyaxche 1 pasto  
Floridichthys polyommus|CH790-A09|Laguna Chunyaxche 1 pasto  
Floridichthys polyommus|CH790-A10|Laguna Chunyaxche 1 pasto  
Floridichthys polyommus|CH790-B03|Laguna Chunyaxche 1 pasto  
Floridichthys polyommus|CH790-B04|Laguna Chunyaxche 1 pasto  
Floridichthys polyommus|CH790-B05|Laguna Chunyaxche 1 pasto  
Floridichthys polyommus|CH790-B06|Laguna Chunyaxche 1 pasto  
Floridichthys polyommus|CH790-B07|Laguna Chunyaxche 1 pasto  
Floridichthys polyommus|CH790-B08|Laguna Chunyaxche 1 pasto  
Floridichthys polyommus|CH790-B10|Laguna Chunyaxche 1 pasto  
Floridichthys polyommus|CH790-B11|Laguna Chunyaxche 1 pasto  
Floridichthys polyommus|CH790-C01|Laguna Chunyaxche 1 pasto  
Floridichthys polyommus|CH790-C02|Laguna Chunyaxche 2 manglar  
Floridichthys polyommus|CH790-C03|Laguna Chunyaxche 2 manglar  
Floridichthys polyommus|CH790-C04|Laguna Chunyaxche 1 pasto  
Floridichthys polyommus|CH790-C05|Laguna Chunyaxche 1 pasto  
Floridichthys polyommus|CH790-C06|Laguna Chunyaxche 1 pasto  
Floridichthys polyommus|CH790-C07|Laguna Chunyaxche 1 pasto  
Floridichthys polyommus|CH790-C08|Laguna Chunyaxche 1 pasto  
Floridichthys polyommus|CH790-C09|Laguna Chunyaxche 1 pasto  
Floridichthys polyommus|CH790-C10|Laguna Chunyaxche 1 pasto  
Floridichthys polyommus|CH790-C11|Laguna Chunyaxche 2 manglar  
Floridichthys polyommus|CH790-D09|Muyil 1  
Floridichthys polyommus|CH790-E11|Muyil 2  
Floridichthys polyommus|CH790-E12|Muyil 2  
Floridichthys polyommus|CH790-F01|Muyil 2  
Floridichthys polyommus|CH790-F05|Muyil 2  
Floridichthys polyommus|CH790-F06|Muyil 2  
Floridichthys polyommus|CH790-F08|Muyil 2  
Floridichthys polyommus|CH790-F09|Muyil 2  
Floridichthys polyommus|CH790-F10|Muyil 2  
Floridichthys polyommus|CH790-G01|Laguna Chunyaxche 2 manglar  
Floridichthys polyommus|CH790-G08|Laguna Chunyaxche 1 pasto  
Floridichthys polyommus|CH790-G11|Laguna Chunyaxche 1 pasto  
Floridichthys polyommus|CH790-D01|Laguna Chunyaxche 2 manglar  
Floridichthys polyommus|CH790-B12|Laguna Chunyaxche 1 pasto  
Floridichthys polyommus|CH790-B09|Laguna Chunyaxche 1 pasto  
Floridichthys polyommus|CH790-F03|Muyil 2  
Floridichthys polyommus|CH765-E12|Laguna Muyil 1|BOLD:AAA6554  
Floridichthys polyommus|CH765-G10|Laguna Chunyaxche 1|BOLD:AAA6554  
Floridichthys polyommus|CH765-C09|Laguna Chunyaxche 1|BOLD:AAA6554  
Floridichthys polyommus|CH765-C04|Laguna Chunyaxche 1|BOLD:AAA6554  
Jordanelia pulchra|CH790-E01|Muyil 1  
Jordanelia pulchra|CH765-F05|Laguna Chunyaxche 2|BOLD:AAD5728  
Jordanelia pulchra|CH765-F03|Laguna Muyil 1|BOLD:AAD5728  
Jordanelia pulchra|CH765-F07|Laguna Chunyaxche 2|BOLD:AAD5728  
Jordanelia pulchra|CH765-F10|Laguna Chunyaxche 2|BOLD:AAD5728  
Jordanelia pulchra|CH790-C12|Laguna Chunyaxche 2 manglar  
Jordanelia pulchra|CH790-G06|Laguna Chunyaxche 2 manglar  
Jordanelia pulchra|CH790-G07|Laguna Chunyaxche 2 manglar  
Jordanelia pulchra|CH790-G05|Laguna Chunyaxche 2 manglar  
Jordanelia pulchra|CH765-G11|Laguna Chunyaxche 1|BOLD:AAD5728  
Jordanelia pulchra|CH765-F02|Laguna Muyil 1|BOLD:AAD5728  
Atherinella|CH765-A05|Cenote Pucte Cafetal 1|BOLD:AAI4788  
Atherinella|CH765-A04|Cenote Pucte Cafetal 1|BOLD:AAI4788  
Atherinella|CH765-A03|Cenote Pucte Cafetal 1|BOLD:AAI4788  
Atherinella|CH765-B03|Cenote Pucte 2|BOLD:AAI4788

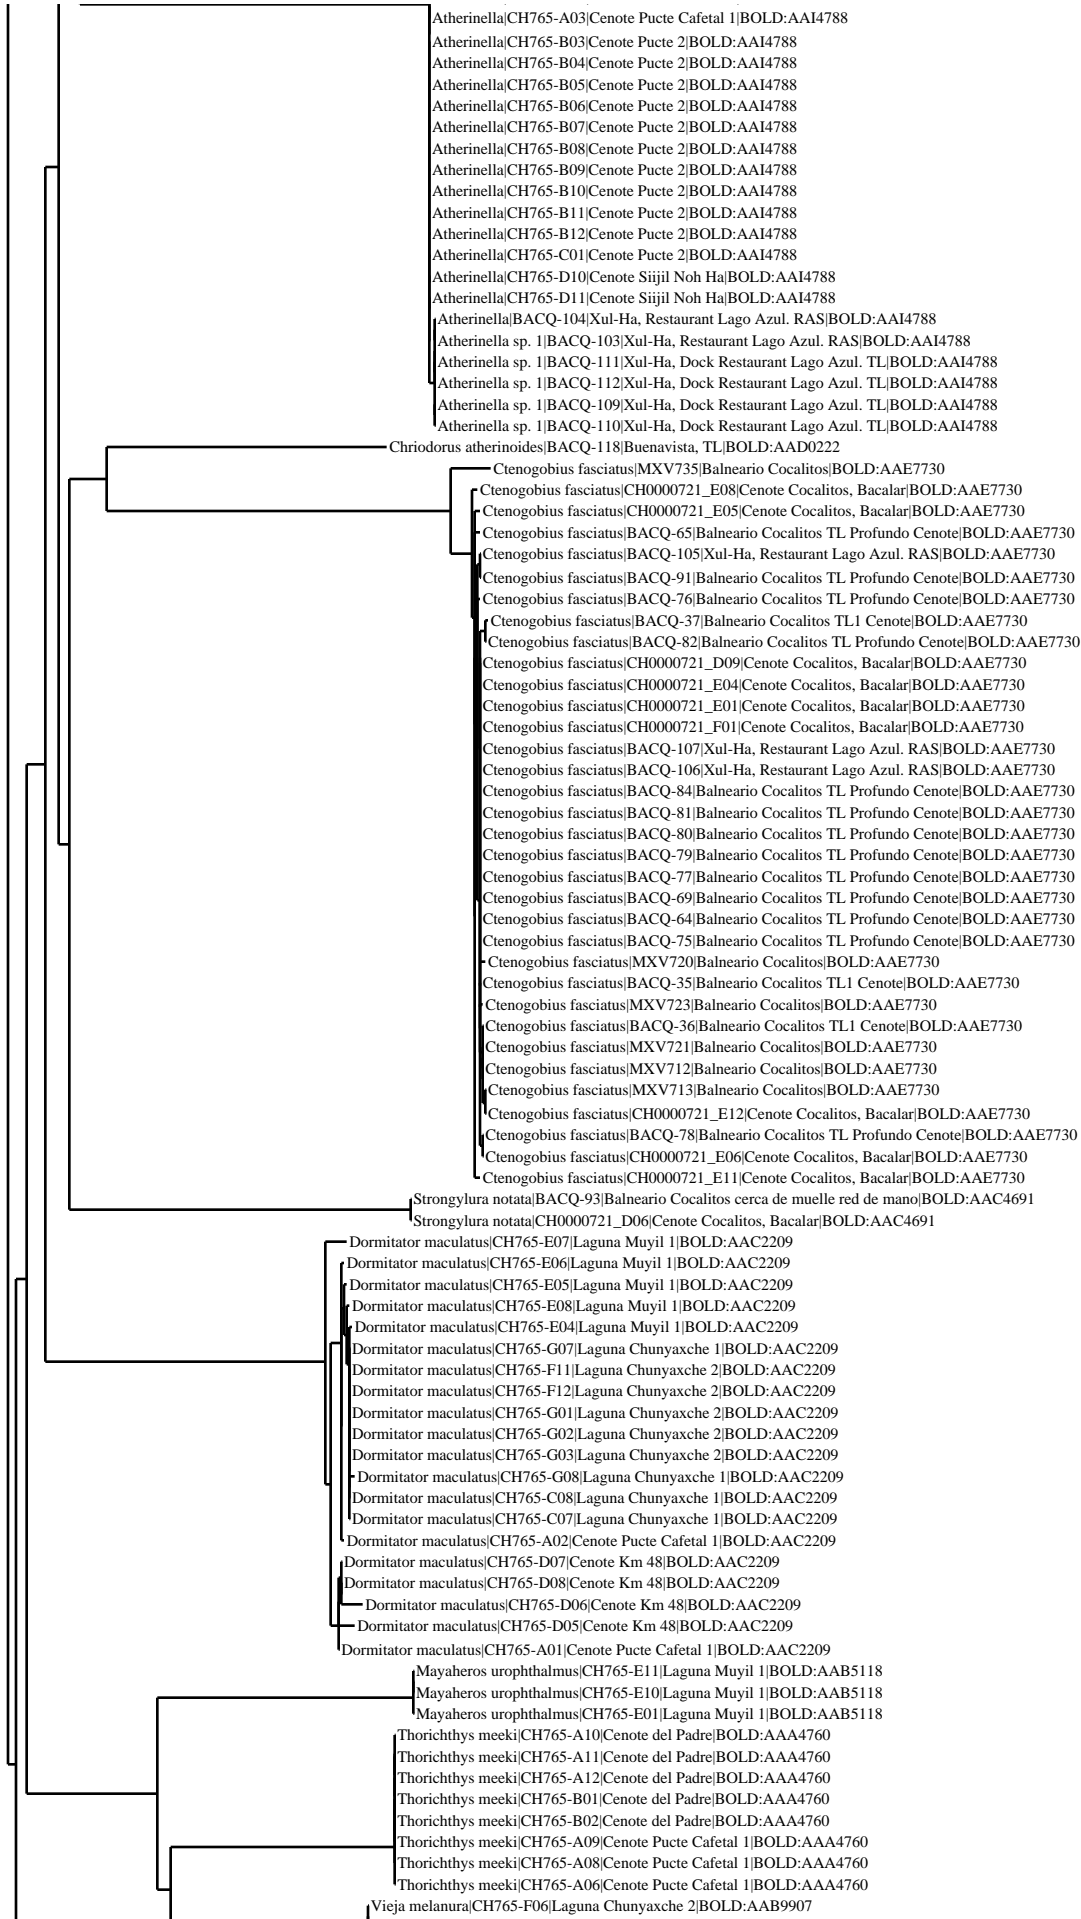

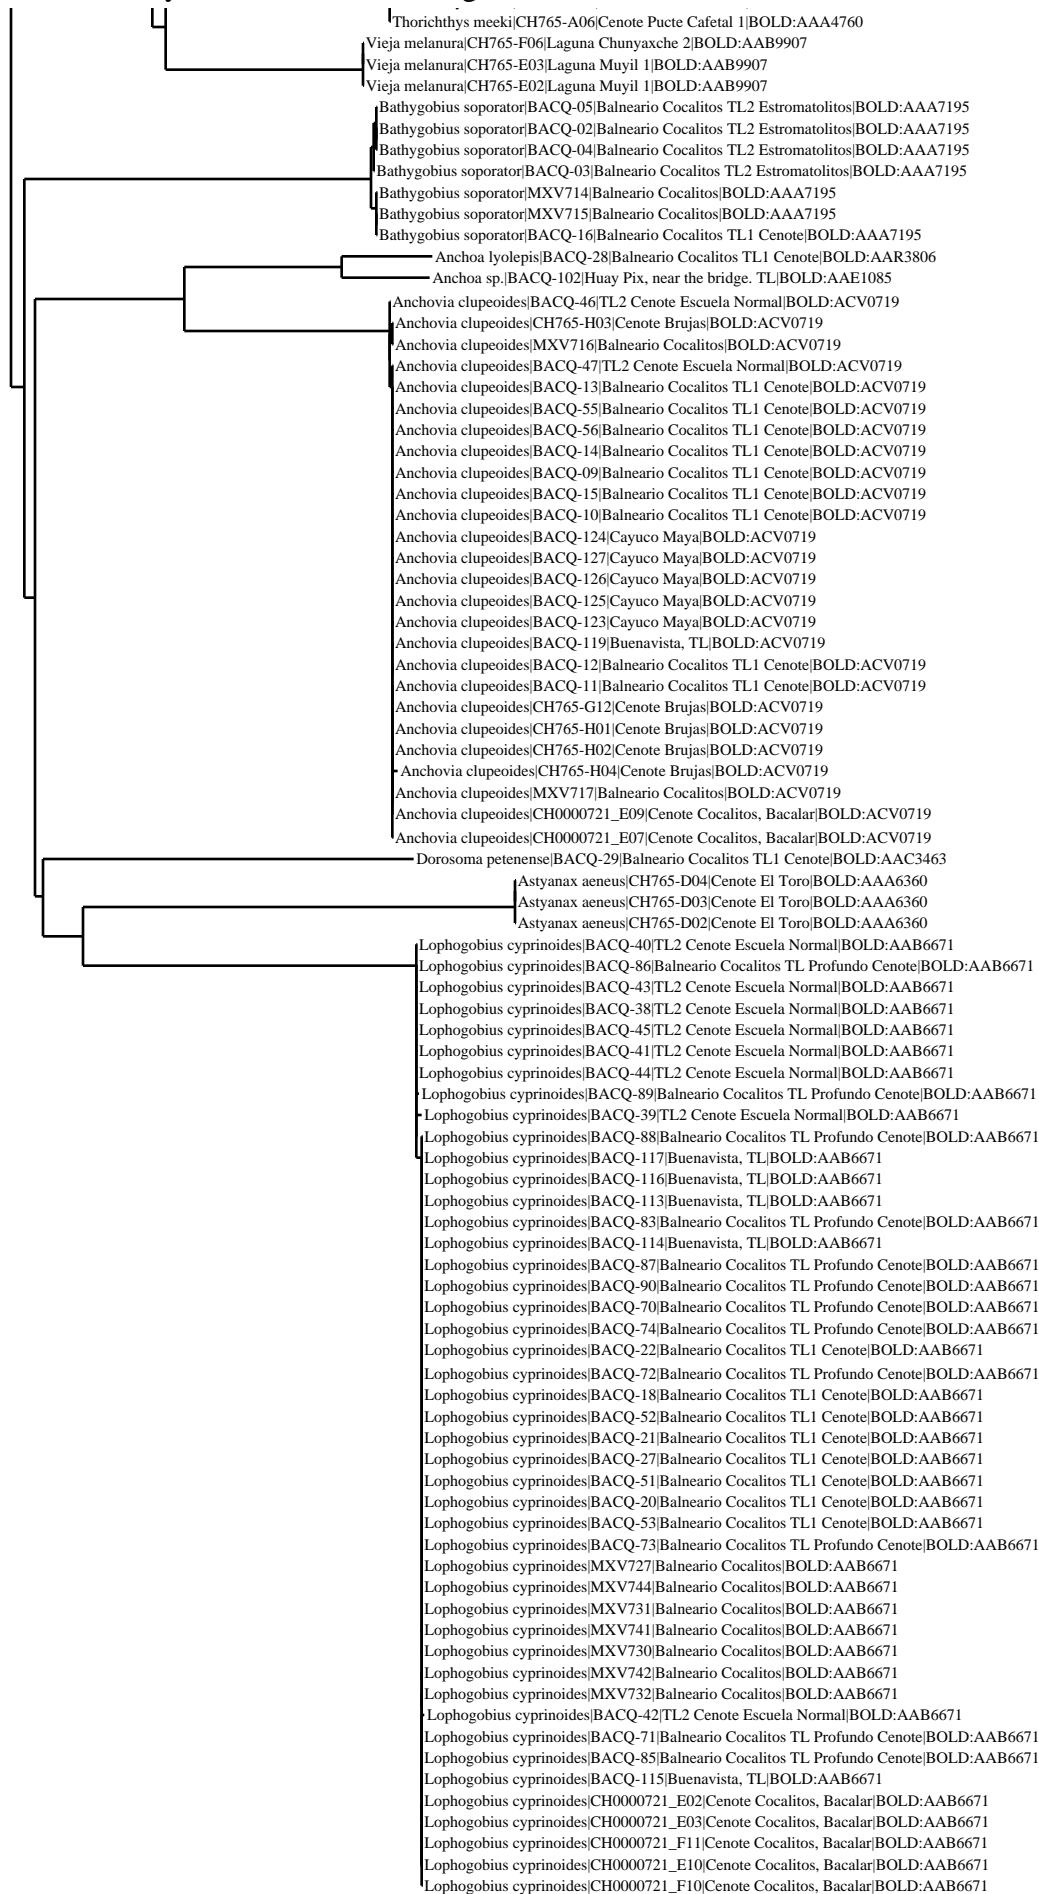

Supplement: s1 [file s1]
